# ASER: Animal Sex Reversal database

Yangyang Li<sup>1, #</sup>, Zonggui Chen<sup>2, #</sup>, Hairong Liu<sup>3, #</sup>, Qiming Li<sup>1</sup>, Xing Lin<sup>2</sup>, Shuhui Ji<sup>3</sup>, Rui Li<sup>3</sup>, Shaopeng Li<sup>1</sup>, Weiliang Fan<sup>1</sup>, Haiping Zhao<sup>3</sup>, Zuoyan Zhu<sup>2</sup>, Wei Hu<sup>2, 4, \*</sup>, Yu Zhou<sup>1, 5, \*</sup>, Daji Luo<sup>2, 3, 4, \*</sup>

<sup>1</sup> State Key Laboratory of Virology, College of Life Sciences, Wuhan University, Wuhan 430072, China

<sup>2</sup> State Key Laboratory of Freshwater Ecology and Biotechnology, Institute of Hydrobiology, Innovation Academy for Seed Design, Chinese Academy of Science, Wuhan 430072, China

<sup>3</sup> School of Basic Medical Science, Wuhan University, Wuhan 430071, China

<sup>4</sup> University of Chinese Academy of Sciences, Beijing 100049, China.

<sup>5</sup> Frontier Science Center for Immunology and Metabolism, Wuhan University, Wuhan 430072, China

<sup>#</sup> Equal contribution.

<sup>\*</sup> Corresponding authors.

Email: huwei@ihb.ac.cn (Hu W), yu.zhou@whu.edu.cn (Zhou Y), luodaji@ihb.ac.cn (Luo DJ)

## Running title: ASER: Animal Sex Reversal Database

The numbers of words: 4321.

The numbers of figures: 4.

The numbers of tables: 1.

The numbers of supplementary figures: 1.

The numbers of supplementary tables: 3.

The numbers of all the References: 40.

The numbers of References from 2014: 23.

- 30 The counts of letters in the article title: 34.
- 31 The counts of letters in the running title: 34.
- 32 The count of keywords: 5.
- 33 The counts of words in Abstract: 183.

## 34 **Abstract**

35 Sex reversal, representing extraordinary sexual plasticity during the life cycle, not  
 36 only triggers reproduction in animals but also affects reproductive and endocrine  
 37 system-related diseases and cancers in humans. Sex reversal has been broadly  
 38 reported in animals, however, an integrated resource hub of sex reversal information  
 39 is still lacking. Here, we constructed a comprehensive database named ASER by  
 40 integrating sex reversal-related data of 18 species from Teleostei to Mammals. We  
 41 systematically collected 40,018 published papers and mined the Sex  
 42 Reversal-associated Genes (SRGs), including their regulatory networks, from 1,611  
 43 core papers. We annotated homologous genes and computed conservation scores for  
 44 whole genomes across the 18 species. Furthermore, we collected 206 available  
 45 RNA-seq data and investigated the expression dynamics of SRGs during sex reversal  
 46 or sex determination processes. In addition, we manually annotated 551 ISH images  
 47 of SRGs from the literature and described their spatial expression in the gonads.  
 48 Collectively, ASER provides a unique and integrated resource for researchers to query  
 49 and reuse organized data to explore the mechanisms and applications of SRGs in  
 50 animal breeding and human health. The ASER database is publicly available at  
 51 <http://aser.ihb.ac.cn/>.

52

53 **KEYWORDS:** Sex reversal; SRGs; Database; Omics; Conservation

54

55

56

57

58

59

60

61

## 62 **Introduction**

63 Sex determination mechanisms in animals mainly include genetic sex  
64 determination (GSD) and environmental sex determination (ESD) [1]. In GSD, the  
65 primary sex of organisms is determined by genetics during fertilization, while  
66 organisms with ESD remain bipotential gonads until they perceive environmental  
67 stress to promote sex differentiation during ontogeny [2]. For many years, it was  
68 dogma in vertebrates in the field of sex determination that sex would be fixed for life  
69 after primary sex determination. After sex reversal was first reported in *Aplocheilus*  
70 *latipes* and natural sex reversal was found in *Monopterus javanensis* [3], it has been  
71 widely accepted that sex determination is amazingly plastic in vertebrates, especially  
72 in fish. This plasticity shows that sexual fate is not an irreversible process. Indeed,  
73 this reversible process leads to sex reversal, a redirection of the sexual phenotype  
74 during development [4]. Environmental factors can override genetic factors to redirect  
75 sexual fate in fish [5] and reptiles [6]. Sex reversal was found to be driven by diverse  
76 factors, such as genes, hormones, temperature, and social changes [7]. Unlike sex  
77 change, which implies a transition from the stabilized sex to the opposite sex, sex  
78 reversal occurs during gonadal development, including the initiation phase and  
79 maintenance phase of sex determination [4].

80 Specifically, sex reversal has been studied in fish, reptiles, birds, amphibians and  
81 even in mammals. In fish, gonadal differentiation is roughly divided into two groups:  
82 hermaphroditic and gonochoristic [5]. Hermaphroditic species undergo sex reversal  
83 during their lifetime and include 3 strategies: female-to-male (protogynous),  
84 male-to-female (protandrous), or bidirectional (serial) sex change [8]. Taking  
85 *Monopterus albus* as an example, an individual is female from the embryonic stage to  
86 first sexual maturity, then enters an intersex state, and later develops into a male [9].  
87 Additionally, some hermaphroditic species undergo socially cued female-to-male sex  
88 reversal, whereby the removal of the dominant male induces sex reversal in a resident  
89 female, such as *Thalassoma bifasciatum* [10]. Among gonochoristic fish, sex reversal

is a synergistic result of both GSD and ESD [11]. For example, *Cynoglossus semilaevis* is a gonochoristic fish with a female heterogametic sex determination system ( $ZW^{\ominus}/ZZ^{\ominus}$ ) characterized by GSD and TSD (a subclass of ESD) [12]. In many reptiles, including *Trachemys scripta*, gonadal sex is determined by the environmental temperature during egg incubation [13]. However, estrogens, including estradiol-17 $\beta$ , have also been proven to participate in the sex determination of *T. scripta* [14]. Sex reversal in birds such as *Gallus gallus*, is mainly related to alterations in sex steroid hormone action, especially estrogens [15]. Amphibians also show plasticity in sex determination, influenced by estrogens, androgens [16], and sometimes by temperature [17]. Sex determination in mammals has been reported to depend on three processes: chromosome determination (XX or XY), appropriate pathway of gonadal differentiation, and accurate development of secondary sexual characteristics [18]. Disrupting any of these three steps of gonadal differentiation can lead to aberrant sex determination. In *Homo sapiens*, the frequencies of XX and XY sex reversal are 1/20,000 and 1/3,000, respectively, and most of these cases are caused by translocations of the sex-determining *SRY* gene [19]. Although sex reversal has been broadly reported among vertebrates, the molecular events underlying sex reversal remain poorly understood, limited by the lack of integrated omics data across species.

Although there are several reproduction-related resources, such as GUDMAP [20], GonadSAGE [21] and ReproGenomics Viewer [22], an integrated and dedicated database for the community studying sex determination and differentiation is missing. The GUDMAP database is a comprehensive gene expression dataset of the developing genitourinary system in mouse with both *in situ* and microarray data. GonadSAGE is a serial analysis of gene expression database for male embryonic gonad development in mouse. The ReproGenomics Viewer is a cross-species database of omics data such as RNA-seq and ChIP-seq for tissues related to reproduction, such as gametogenesis, in 9 model organisms. Here, we developed the Animal Sex Reversal database (ASER), the first functional genomics hub for sex reversal to our best knowledge. The main works of ASER can be roughly divided as follows: (1) We

120 screened 18 important and typical species with sex reversal phenomena from Teleostei  
 121 to Mammalia, including *Betta splendens*, *Cyprinus carpio*, *Cynoglossus semilaevis*,  
 122 *Danio rerio*, *Equus caballus*, *Epinephelus coioides*, *Lates calcarifer*, *Monopterus*  
 123 *albus*, *Oryzias latipes*, *Oreochromis niloticus*, *Paralichthys olivaceus*, *Thalassoma*  
 124 *bifasciatum*, *Xenopus laevis*, *Gallus gallus*, *Bos taurus*, *Mus musculus*, and *Homo*  
 125 *sapiens*, and summarized the major inducements of sex reversal or common  
 126 approaches used to manipulate sex in these species (**Table 1**). (2) We compiled a list  
 127 of the most common genes or drugs related to sex reversal. Then, we collected and  
 128 analyzed PubMed literature to mine the Sex Reversal-associated Genes (SRGs) and  
 129 obtained their regulatory networks. Meanwhile, we gathered protein-protein  
 130 interaction networks related to SRGs from the STRING database. (3) To facilitate  
 131 users comparing the homology of SRGs in different species, we collected or  
 132 assembled the gene annotations for the 18 species, identified homologous genes,  
 133 computed the basewise conservation scores across these species, and identified  
 134 conserved motifs for orthologous gene groups. (4) We systematically processed  
 135 available RNA sequencing (RNA-seq) data and provided gene expression dynamics  
 136 during sex reversal between females and males or different developmental stages. A  
 137 user-friendly genome browser was customized to visualize these genome-wide data.  
 138 (5) We collected and annotated available *in situ* hybridization and  
 139 immunocytochemistry (ISH, FISH, and ICH) data to display the spatial expression of  
 140 SRGS in the gonads. In conclusion, our ASER database provides comprehensive and  
 141 systemic integration of sex reversal related data, and we believe that this open  
 142 resource will greatly promote research on the mechanisms of sex reversal.

143

## 144 **Data collection and database content**

145

### 146 **Framework of ASER**

147 An overview of the ASER database and web server is shown in **Figure 1**. The ASER  
 148 database contains information for 18 sex reversal species, SRG regulatory networks,

149 homology alignment, and (fluorescence) *in situ* hybridization and  
 150 immunocytochemistry (ISH, FISH, and ICH) images of SRGs. The preprocessed data  
 151 was managed with the MySQL database. Django-based applications were developed  
 152 to provide a user-friendly interface including an embedded genome browser for  
 153 visualizing genome-wide data. The key workflows, tools, and processed data are  
 154 summarized in Figure S1A-B and described in detail below.

155

## 156 **Data sources**

157 SRG information and their regulatory networks were curated from PubMed literature.  
 158 All genome sequences and species information used in this database were  
 159 downloaded from NCBI public databases. All raw sequencing data were downloaded  
 160 from the Sequence Read Archive (SRA) of NCBI. The sets of RNA-seq data were  
 161 organized by species, gonad developmental stages, and temperature (Table S1). In  
 162 addition, we retrieved images related to sex reversal from the OPENi  
 163 (<https://openi.nlm.nih.gov/>) and ZFIN databases [23].

164

## 165 **SRG mining**

166 We retrieved thousands of articles from PubMed by querying species and functional  
 167 keywords (e.g., sex reversal). First, the abstracts and full texts of these articles were  
 168 collected by text crawler technology. The full texts of non-open access papers were  
 169 obtained through the library portal of Wuhan University. Next, we separated a chunk  
 170 of continuous text into separate words, and carried out word stemming to remove  
 171 plural and different tenses. Then, we removed stop words such as “the”, “is”,  
 172 and “however”. Finally, we counted the frequency of the words from the literature and  
 173 manually filtered out some high-frequency but irrelevant words such as  
 174 “masculinizing”, “ovotestes”, “pseudomale”, “hermaphrodite”, and “gynogenesis”  
 175 into a blacklist until most of the high-frequency words were gene symbols and drug  
 176 names. The remaining words related to genes and drugs were manually added to the  
 177 wordlist (Table S2).

178 We retained 1,611 papers that contained the words in the wordlist and manually

179 read them with notations about SRG regulation (Table S3). Finally, we found 258  
180 SRGs, 6 drugs and 11 hormones, which were validated to be functional in sex reversal  
181 in different species, and constructed the regulatory networks of SRGs. We next  
182 predicted another 498 genes that were homologous with those SRGs in the 18 species  
183 (Figure S1C). Furthermore, protein-protein interaction (PPI) networks of SRGs were  
184 extracted from the STRING database [24].

185

### 186 **RNA-seq data processing**

187 The data quality of the collected RNA-seq data was assessed using FastQC  
188 (<http://www.bioinformatics.babraham.ac.uk/projects/fastqc/>), and the adapters and  
189 low-quality bases in raw reads were removed using Trim Galore  
190 ([http://www.bioinformatics.babraham.ac.uk/projects/trim\\_galore/](http://www.bioinformatics.babraham.ac.uk/projects/trim_galore/)). Filtered reads  
191 were aligned to the genome using STAR [25] in end-to-end mode. The primary  
192 alignments were retained through SAMtools [26]. Gene expression quantification in  
193 FPKM (Fragments Per Kb of exon per Million mapped fragments) was computed  
194 using StringTie [27]. Differential expression analysis was performed using DESeq2  
195 [28].

196

### 197 **Transcriptome assembly**

198 High-quality reads were *de novo* assembled using StringTie [27] with default  
199 parameter settings. The longest ORFs were predicted in assembled transcripts using  
200 TransDecoder.LongOrfs (<https://help.rc.ufl.edu/doc/TransDecoder>). DIAMOND [29]  
201 was used to collect homologous evidence of identified ORFs from the UniProt  
202 database (<https://www.uniprot.org/>). The potential coding regions were further refined  
203 by TransDecoder.Predict. Finally, a GFF3 file based on the coding regions of the  
204 reference genome was generated through the `cdna_alignment_orf_to_genome_orf.pl`  
205 function in TransDecoder.

206

### 207 **Homology alignment**

208 Orthologous groups of SRGs were identified among all sex reversal species using the



209 BLAST [30] all-v-all algorithm in OrthoFinder [31]. Conserved motifs of orthogroups  
210 were predicted using MEME [32]. Comparisons between conserved motifs and  
211 known motifs were performed using Tomtom [33]. Species tree was constructed  
212 according to the species taxonomy on NCBI. Meanwhile, the evolutionary  
213 relationship was verified by OrthoFinder using the STAG [34] algorithm and rooted  
214 using the STRIDE [35] algorithm.

215 For the orthologue tracks in a reference species, the homologous genes in other  
216 species were mapped to the reference genome using Blat [36]. Alignments with  
217 sequence identity larger than or equal to 60% were retained, and the maximum intron  
218 size was set to 450,000 bp.

219 For the conservation track, pairwise alignments between genome sequences were  
220 built using LASTZ [37], and MULTIZ [38] was then used to construct multiple  
221 alignments, based on which the conservation scores were calculated using phyloP  
222 from the PHAST package [39].

223

## 224 **Image collection and annotation**

225 We collected available (fluorescence) *in situ* hybridization and immunocytochemistry  
226 (ISH, FISH and ICH) data related to SRGs from the OPENi and ZFIN databases. The  
227 images were classified by gene, differentiation status, developmental period, and  
228 gender. We manually added descriptions for those images based on the original figure  
229 legends and articles.

230

## 231 **Web interface and usage**

232 ASER is a user-friendly database, and all the contents are interactive and dynamic.  
233 There are five main functional modules, including SPECIES, IMAGE, SRG, GENE  
234 and BROWSER. In addition, the SEARCH module was developed to display and  
235 interconnect different kinds of data in other modules.

236 For the “SPECIES” module, the evolutionary tree constructed for the 18 sex  
237 reversal species is displayed on the main page (**Figure 2A**). The reported

238 inducements of sex reversal or common approaches used to manipulate sex in each  
239 species are displayed on this page, including natural processes, genetic abnormality  
240 (*e.g.*, *amh* overexpression), administration of exogenous hormones or drugs (*e.g.*,  
241  $17\alpha$ -methyltestosterone), temperature changes during gonadal differentiation, and  
242 manipulation of social factors. The literature supporting this information is also  
243 provided. Users can click on any species to obtain detailed descriptions and genome  
244 information for this species (**Figure 2B**).

245 For the “IMAGE” module, we summarized the morphological characteristics of  
246 zebrafish and mouse ovary at different developmental stages to help users better  
247 understand the content of this module (**Figure 2C**). The (fluorescence) *in situ*  
248 hybridization and immunocytochemistry (ISH, FISH and ICH) data related to specific  
249 SRGs can be queried in different ways by species, gene, differentiative stage, and  
250 gonad. Detailed descriptions of images are shown to help users understand the spatial  
251 distribution of SRGs in the gonads (**Figure 2D**).

252 The “SRG” module includes word cloud, regulatory and PPI networks, and search  
253 pages. The word cloud figure is dynamically presented by species with hyperlinks on  
254 the nodes (**Figure 3A**). When the user clicks one node, the original references and  
255 additional actions for more information will be shown under the figure. For any  
256 validated SRG, ASER allows users to obtain its regulators (including genes, hormones,  
257 drugs), targets, and the associated modes of regulation (**Figure 3B**). At the same time,  
258 PPI networks of these SRGs in different species are also displayed (**Figure 3C**), in  
259 which the colors of the edges are used to distinguish known interactions  
260 (experimentally\_determined\_interaction, database\_annotated), predicted interactions  
261 (neighborhood\_on\_chromosome, gene\_fusion, phylogenetic\_cooccurrence), and other  
262 types (homology, coexpression, automated\_textmining). In addition, the search page  
263 provides an interface for a specific SRG to show its regulatory network and more  
264 detailed information, such as tissue, developmental stage, and literature evidence  
265 (**Figure 3D–E**).

266 The “GENE” module provides different kinds of data for any annotated gene,  
267 some of which are linked to the “BROWSER” module for visualization. The links

corresponding to the query gene are shown in the search page by species and gene symbol (**Figure 4A**). Detailed information for a specific query gene includes its orthogroup in all species, predicted motifs, and similar known motifs (**Figure 4B**). The orthologous genes and 18-way conservation scores for the query gene can be inspected in BROWSER tracks (**Figure 4C**). Detailed alignment information can be obtained and downloaded by clicking on the track. In addition, the gene expression quantifications in FPKM across different stages, tissues, and conditions are shown as bar plots and in detail as tables (**Figure 4D**). The RNA-seq signal profiles are displayed in BROWSER, and the tracks can be customized easily, including color, scale, height, and *etc.* For any species, the available tracks can be dynamically selected or unselected. For example, in *Danio rerio*, a subset of RNA-seq tracks are shown for the *sox9* gene during sex reversal (**Figure 4E**).

## Discussion

Studies on sex reversal have been especially useful in helping redefine the concept of sex determination. There are diverse master sex-determining genes reported in different species. In addition, genes previously known to be involved in sex determination or differentiation are emerging as potential key components of sex reversal in other vertebrates [40]. Therefore, studies in different species continue to reveal genes with unexpected roles in sex reversal, and their homologs in other vertebrates also deserve investigation. ASER fills the gap of the sex reversal database by integrating diverse information at different levels for the 18 species with sex reversal, including curated SRGs, RNA-seq data, image data, and conservation data.

For any collected sex reversal species, users can obtain major inducements of sex reversal in this species in the SPECIES module. For any SRG, users can obtain its regulators, targets during sex determination in the SRG module and spatial distribution in different stages in the IMAGE module. For any annotated gene, users can obtain its homologous genes and conserved motifs in 18 species in the GENE module. Furthermore, users can also explore and visualize expression dynamics

297 across different conditions in the GENE or BROWSER modules.

298 In the future, we will continuously select important and typical sex reversal  
299 species as their complete genome and omics data from both “female” and “male”  
300 samples become available. Hermaphroditic fish such as *Synbranchus marmoratus* and  
301 *Amphiprion perideraion* and invertebrates such as *Macrobrachium rosenbergii* and  
302 *Venus mercenaria* are candidates. In addition, we will add more omics data, such as  
303 sRNA-seq, BS-seq and ChIP-seq data. We expect that the resources in ASER will  
304 promote further studies to decode the molecular mechanisms of sex reversal.

305

### 306 **Data availability**

307 ASER is publicly available at <http://aser.ihb.ac.cn/>.

308

### 309 **CRedit author statement**

310 **Yangyang Li:** Software, Formal analysis, Data curation, Writing - original draft,  
311 Writing - review and editing. **Zonggui Chen:** Software, Formal analysis,  
312 Visualization, Writing - review and editing. **Hairong Liu:** Investigation, Data curation.  
313 Writing - review and editing. **Qiming Li:** Formal analysis. **Xing Lin:** Data curation.  
314 **Shuhui Ji:** Data curation. **Rui Li:** Data curation. **Shaopeng Li:** Data curation.  
315 **Weiliang Fan:** Visualization. **Haiping Zhao:** Data curation. **Zuoyan Zhu:** Writing -  
316 review & editing. **Wei Hu:** Conceptualization, Funding acquisition, Writing - review  
317 & editing. **Yu Zhou:** Conceptualization, Project administration, Funding acquisition,  
318 Methodology, Writing - review and editing. **Daji Luo:** Conceptualization, Project  
319 administration, Funding acquisition, Methodology, Writing - review and editing. All  
320 authors read and approved the final manuscript.

321

### 322 **Competing interests**

323 The authors declare no conflict of interest.

324

## 325 **Acknowledgements**

326 This work was supported by grants from the National Natural Science Foundation of  
327 China (31922085, 31872191 to DL, 31922039 to YZ), the Strategic Priority Research  
328 Program of CAS (XDA24010108) to WH and DL, and Natural Science Foundation of  
329 of Hubei Province (2020CFA056 to DL and 2020CFA057 to YZ). Part of the  
330 computation of this work was done in the Supercomputing Center of Wuhan  
331 University and Hydrobiological Data Analysis Center.

332

## 333 **ORCID**

334 0000-0002-8441-8484 (Yangyang Li)  
335 0000-0003-3346-2765 (Zonggui Chen)  
336 0000-0002-6458-1786 (Hairong Liu)  
337 0000-0003-4183-9913 (Qiming Li)  
338 0000-0002-8471-6684 (Xing Lin)  
339 0000-0002-4696-9330 (Shuhui Ji)  
340 0000-0002-4434-2120 (Rui Li)  
341 0000-0001-6415-2562 (Shaopeng Li)  
342 0000-0003-4570-7686 (Weiliang Fan)  
343 0000-0002-3982-3624 (Haiping Zhao)  
344 0000-0002-6475-6427 (Wei Hu)  
345 0000-0002-2102-9377 (Yu Zhou)  
346 0000-0002-8051-9624 (Daji Luo)

347

## 348 **References**

349 [1] Shao C, Li Q, Chen S, Zhang P, Lian J, Hu Q, et al. Epigenetic modification and  
350 inheritance in sexual reversal of fish. *Genome Res* 2014;24:604–15.  
351 [2] Budd AM, Banh QQ, Domingos JA, Jerry DR. Sex Control in Fish: Approaches,  
352 Challenges and Opportunities for Aquaculture. *Journal of Marine Science and*  
353 *Engineering* 2015;3:329–55.

- 354 [3] Mei J, Gui JF. Genetic basis and biotechnological manipulation of sexual  
355 dimorphism and sex determination in fish. *Sci China Life Sci* 2015;58:124–36.
- 356 [4] Weber C, Capel B. Sex reversal. *Curr Biol* 2018;28:R1234–R6.
- 357 [5] Devlin RH, Nagahama Y. Sex determination and sex differentiation in fish: an  
358 overview of genetic, physiological, and environmental influences. *Aquaculture*  
359 2002;208:191–364.
- 360 [6] Holleley CE, O'Meally D, Sarre SD, Marshall Graves JA, Ezaz T, Matsubara K, et  
361 al. Sex reversal triggers the rapid transition from genetic to temperature-dependent  
362 sex. *Nature* 2015;523:79–82.
- 363 [7] Baroiller JF, D'Cotta H. Environment and sex determination in farmed fish. *Comp*  
364 *Biochem Physiol C Toxicol Pharmacol* 2001;130:399–409.
- 365 [8] Todd EV, Liu H, Muncaster S, Gemmell NJ. Bending Genders: The Biology of  
366 Natural Sex Change in Fish. *Sex Dev* 2016;10:223–41.
- 367 [9] Chen HJ, Liu HR, Li R, Lin X, Luo HR, Ji SH, et al. Blood cell identification and  
368 hematological analysis during natural sex reversal in rice field eel (*Monopterus albus*).  
369 *Aquaculture* 2021;538.
- 370 [10] Thomas JT, Todd EV, Muncaster S, Lokman PM, Damsteegt EL, Liu H, et al.  
371 Conservation and diversity in expression of candidate genes regulating  
372 socially-induced female-male sex change in wrasses. *PeerJ* 2019;7:e7032.
- 373 [11] Capel B. Vertebrate sex determination: evolutionary plasticity of a fundamental  
374 switch. *Nat Rev Genet* 2017;18:675–89.
- 375 [12] Liu J, Liu X, Jin C, Du X, He Y, Zhang Q. Transcriptome Profiling Insights the  
376 Feature of Sex Reversal Induced by High Temperature in Tongue Sole *Cynoglossus*  
377 *semilaevis*. *Front Genet* 2019;10:522.
- 378 [13] Holleley CE, Sarre SD, O'Meally D, Georges A. Sex Reversal in Reptiles:  
379 Reproductive Oddity or Powerful Driver of Evolutionary Change? *Sex Dev*  
380 2016;10:279–87.
- 381 [14] Crews D, Cantu AR, Rhen T, Vohra R. The relative effectiveness of estrone,  
382 estradiol-17 beta, and estriol in sex reversal in the red-eared slider (*Trachemys*  
383 *scripta*), a turtle with temperature-dependent sex determination. *Gen Comp*

384 Endocrinol 1996;102:317–26.

385 [15] Major AT, Smith CA. Sex Reversal in Birds. *Sex Dev* 2016;10:288–300.

386 [16] Nakamura M. Is a sex-determining gene(s) necessary for sex-determination in  
387 amphibians? Steroid hormones may be the key factor. *Sex Dev* 2013;7:104–14.

388 [17] Wallace H, Badawy GM, Wallace BM. Amphibian sex determination and sex  
389 reversal. *Cell Mol Life Sci* 1999;55:901–9.

390 [18] Quinn A, Koopman P. The molecular genetics of sex determination and sex  
391 reversal in mammals. *Semin Reprod Med* 2012;30:351–63.

392 [19] Camerino G, Parma P, Radi O, Valentini S. Sex determination and sex reversal.  
393 *Curr Opin Genet Dev* 2006;16:289–92.

394 [20] Harding SD, Armit C, Armstrong J, Brennan J, Cheng Y, Haggarty B, et al. The  
395 GUDMAP database - an online resource for genitourinary research. *Development*  
396 2011;138:2845–53.

397 [21] Lee TL, Li YM, Cheung HH, Claus J, Singh S, Sastry C, et al. GonadSAGE: a  
398 comprehensive SAGE database for transcript discovery on male embryonic gonad  
399 development. *Bioinformatics* 2010;26:585–6.

400 [22] Darde TA, Lecluze E, Lardenois A, Stevant I, Alary N, Tuttelmann F, et al. The  
401 ReproGenomics Viewer: a multi-omics and cross-species resource compatible with  
402 single-cell studies for the reproductive science community. *Bioinformatics*  
403 2019;35:3133–9.

404 [23] Bradford Y, Conlin T, Dunn N, Fashena D, Frazer K, Howe DG, et al. ZFIN:  
405 enhancements and updates to the Zebrafish Model Organism Database. *Nucleic Acids*  
406 *Res* 2011;39:D822–9.

407 [24] Szklarczyk D, Morris JH, Cook H, Kuhn M, Wyder S, Simonovic M, et al. The  
408 STRING database in 2017: quality-controlled protein-protein association networks,  
409 made broadly accessible. *Nucleic Acids Research* 2017;45:D362–D8.

410 [25] Dobin A, Davis CA, Schlesinger F, Drenkow J, Zaleski C, Jha S, et al. STAR:  
411 ultrafast universal RNA-seq aligner. *Bioinformatics* 2013;29:15–21.

412 [26] Li H, Handsaker B, Wysoker A, Fennell T, Ruan J, Homer N, et al. The Sequence  
413 Alignment/Map format and SAMtools. *Bioinformatics* 2009;25:2078–9.

414 [27] Pertea M, Kim D, Pertea GM, Leek JT, Salzberg SL. Transcript-level expression  
415 analysis of RNA-seq experiments with HISAT, StringTie and Ballgown. *Nat Protoc*  
416 2016;11:1650–67.

417 [28] Love MI, Huber W, Anders S. Moderated estimation of fold change and  
418 dispersion for RNA-seq data with DESeq2. *Genome Biol* 2014;15:550.

419 [29] Buchfink B, Xie C, Huson DH. Fast and sensitive protein alignment using  
420 DIAMOND. *Nat Methods* 2015;12:59–60.

421 [30] Camacho C, Coulouris G, Avagyan V, Ma N, Papadopoulos J, Bealer K, et al.  
422 BLAST+: architecture and applications. *BMC Bioinformatics* 2009;10:421.

423 [31] Emms DM, Kelly S. OrthoFinder: phylogenetic orthology inference for  
424 comparative genomics. *Genome Biol* 2019;20:238.

425 [32] Bailey TL, Johnson J, Grant CE, Noble WS. The MEME Suite. *Nucleic Acids*  
426 *Res* 2015;43:W39–49.

427 [33] Gupta S, Stamatoyannopoulos JA, Bailey TL, Noble WS. Quantifying similarity  
428 between motifs. *Genome Biol* 2007;8:R24.

429 [34] Emms DM, Kelly S. STAG: Species Tree Inference from All Genes. *bioRxiv*  
430 2018.

431 [35] Emms DM, Kelly S. STRIDE: Species Tree Root Inference from Gene  
432 Duplication Events. *Mol Biol Evol* 2017;34:3267–78.

433 [36] Kent WJ. BLAT--the BLAST-like alignment tool. *Genome Res* 2002;12:656–64.

434 [37] Harris R. Improved pairwise alignment of genomic dna. PhD thesis 2007.

435 [38] Blanchette M, Kent WJ, Riemer C, Elnitski L, Smit AF, Roskin KM, et al.  
436 Aligning multiple genomic sequences with the threaded blockset aligner. *Genome Res*  
437 2004;14:708–15.

438 [39] Ramani R, Krumholz K, Huang YF, Siepel A. PhastWeb: a web interface for  
439 evolutionary conservation scoring of multiple sequence alignments using phastCons  
440 and phyloP. *Bioinformatics* 2019;35:2320–2.

441 [40] Ortega-Recalde O, Goikoetxea A, Hore TA, Todd EV, Gemmell NJ. The Genetics  
442 and Epigenetics of Sex Change in Fish. *Annu Rev Anim Biosci* 2020;8:47–69.

443



444

445

446

447

448 **Figure Legends**

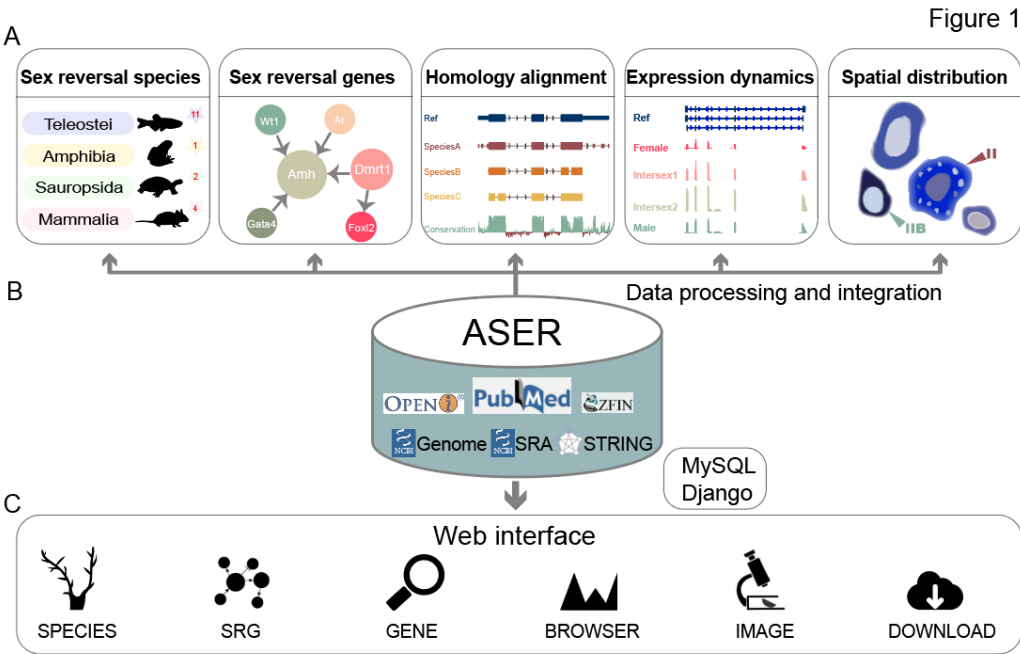

449

450 **Figure 1 Schematic diagram of ASER database**

451 **A.** Five main functional modules in ASER, including the 18 sex reversal species, sex  
452 reversal genes (SRGs) and their regulatory networks, multiple sequence alignments  
453 and conservation scores, gene expression dynamics during sex reversal from  
454 RNA-seq data, spatial distribution of SRGs from ISH, FISH and ICH images. **B.** Data  
455 sources in ASER database. ASER stores all processed data in a MySQL database with  
456 additional indexes and uses the Django framework for interactive queries from the  
457 web interface to the backend database. **C.** Overview of the ASER web interface. The  
458 main functionalities are provided and organized into six modules.

459

Figure 2

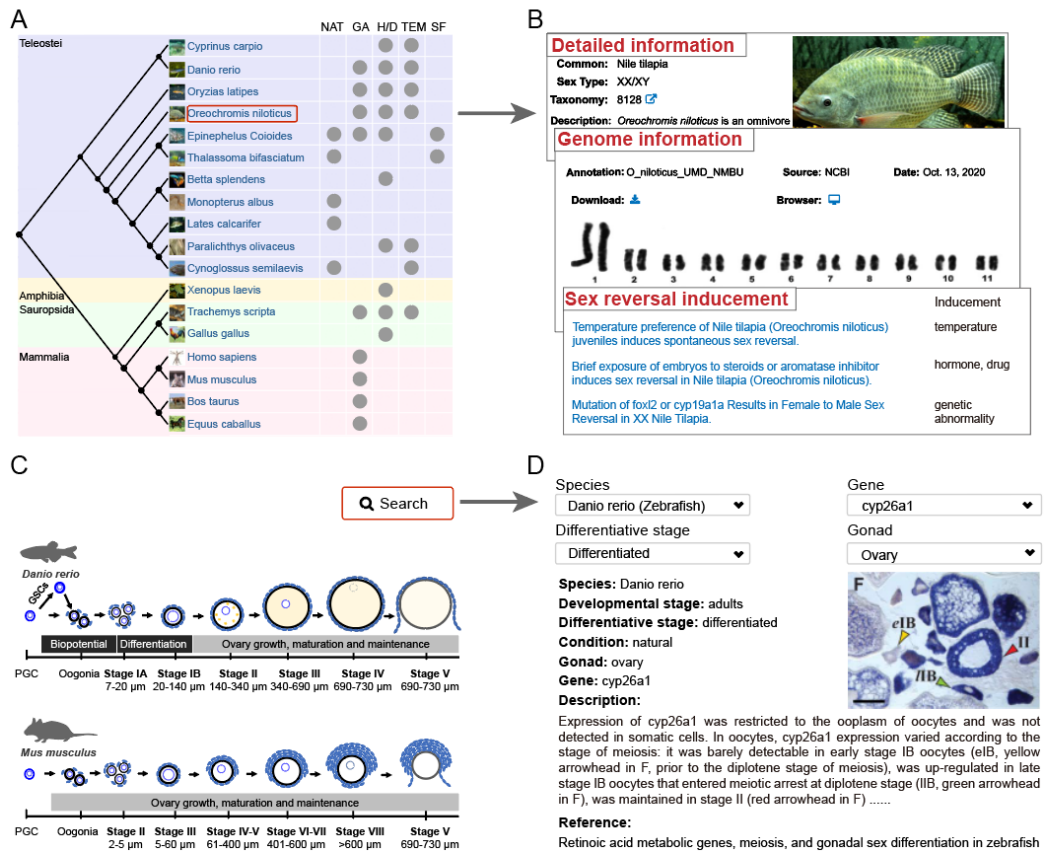

460

461 **Figure 2 Species and image modules in ASER**

462 **A.** Evolutionary relationship and sex reversal inducements of the 18 species belonging  
463 to Teleostei, Mammalia, Sauropsida, and Amphibia. NAT: Natural; GA: Genetic  
464 abnormality; H/D: Hormones or drugs; TEM: Temperature; SF: Social factors. **B.**  
465 Detailed description, genome information, and references related to sex reversal in  
466 each species. **C.** Examples of gonadal morphology at different developmental stages  
467 in mouse and zebrafish. **D.** Image page describing the spatial distribution of SRGs in  
468 gonads, with a representative example of cyp26a1 in ovaries.



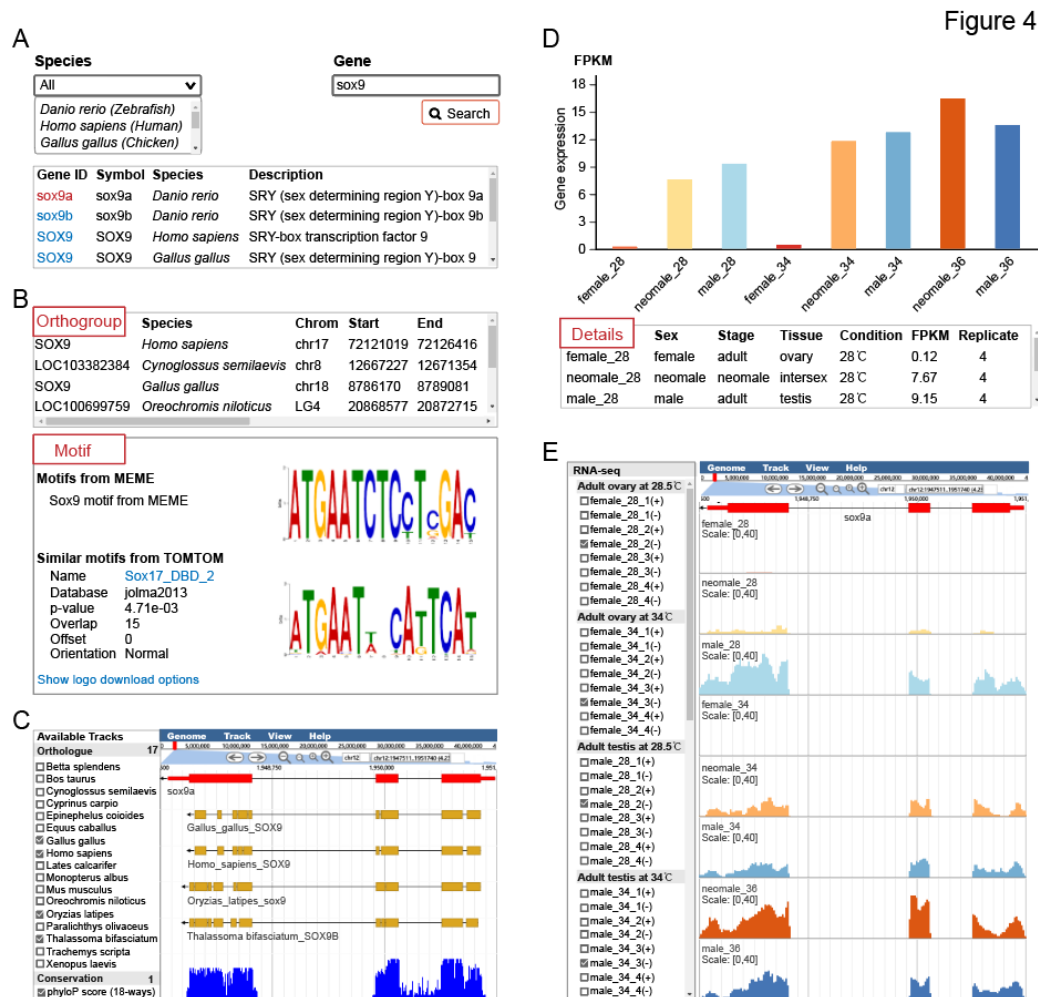

**Figure 4 Gene conservation and expression modules in ASER**

**A.** Search page for any gene in the 18 species. **B.** Homologous genes in the 18 species (top) and motifs corresponding to the query gene (bottom). The conserved motif for these homologous genes was computationally identified by MEME, and known motifs similar to this motif were also presented. **C.** Genome browser tracks of orthologue and conservation scores (18-ways). **D.** Expression dynamics of representative query gene. **E.** Genome browser view of processed RNA-seq signals for a representative query gene (*sox9a* in *zebrafish*).

491 **Tables**

492 **Table 1 Inducements of sex reversal or common approaches used to manipulate**  
 493 **sex in 18 species**

| Species                       | Gonadal differentiation | Inducements/Approaches |
|-------------------------------|-------------------------|------------------------|
| <i>Cyprinus carpio</i>        | gonochoristic           | H/D; TEM               |
| <i>Danio rerio</i>            | gonochoristic           | GA; H/D; TEM           |
| <i>Oryzias latipes</i>        | gonochoristic           | GA; H/D; TEM           |
| <i>Oreochromis niloticus</i>  | gonochoristic           | GA; H/D; TEM           |
| <i>Epinephelus coioides</i>   | hermaphroditic          | NAT; GA; H/D; SF       |
| <i>Thalassoma bifasciatum</i> | hermaphroditic          | NAT; SF                |
| <i>Betta splendens</i>        | gonochoristic           | H/D                    |
| <i>Monopterus albus</i>       | hermaphroditic          | NAT                    |
| <i>Lates calcarifer</i>       | hermaphroditic          | NAT                    |
| <i>Paralichthys olivaceus</i> | gonochoristic           | H/D; TEM               |
| <i>Cynoglossus semilaevis</i> | gonochoristic           | NAT; TEM               |
| <i>Xenopus laevis</i>         | gonochoristic           | H/D                    |
| <i>Trachemys scripta</i>      | gonochoristic           | H/D; TEM; GA           |
| <i>Gallus gallus</i>          | gonochoristic           | H/D                    |
| <i>Homo sapiens</i>           | gonochoristic           | GA                     |
| <i>Mus musculus</i>           | gonochoristic           | GA                     |
| <i>Bos taurus</i>             | gonochoristic           | GA                     |
| <i>Equus caballus</i>         | gonochoristic           | GA                     |

494

495

496

497

498

499

500

501 **Supplementary material**

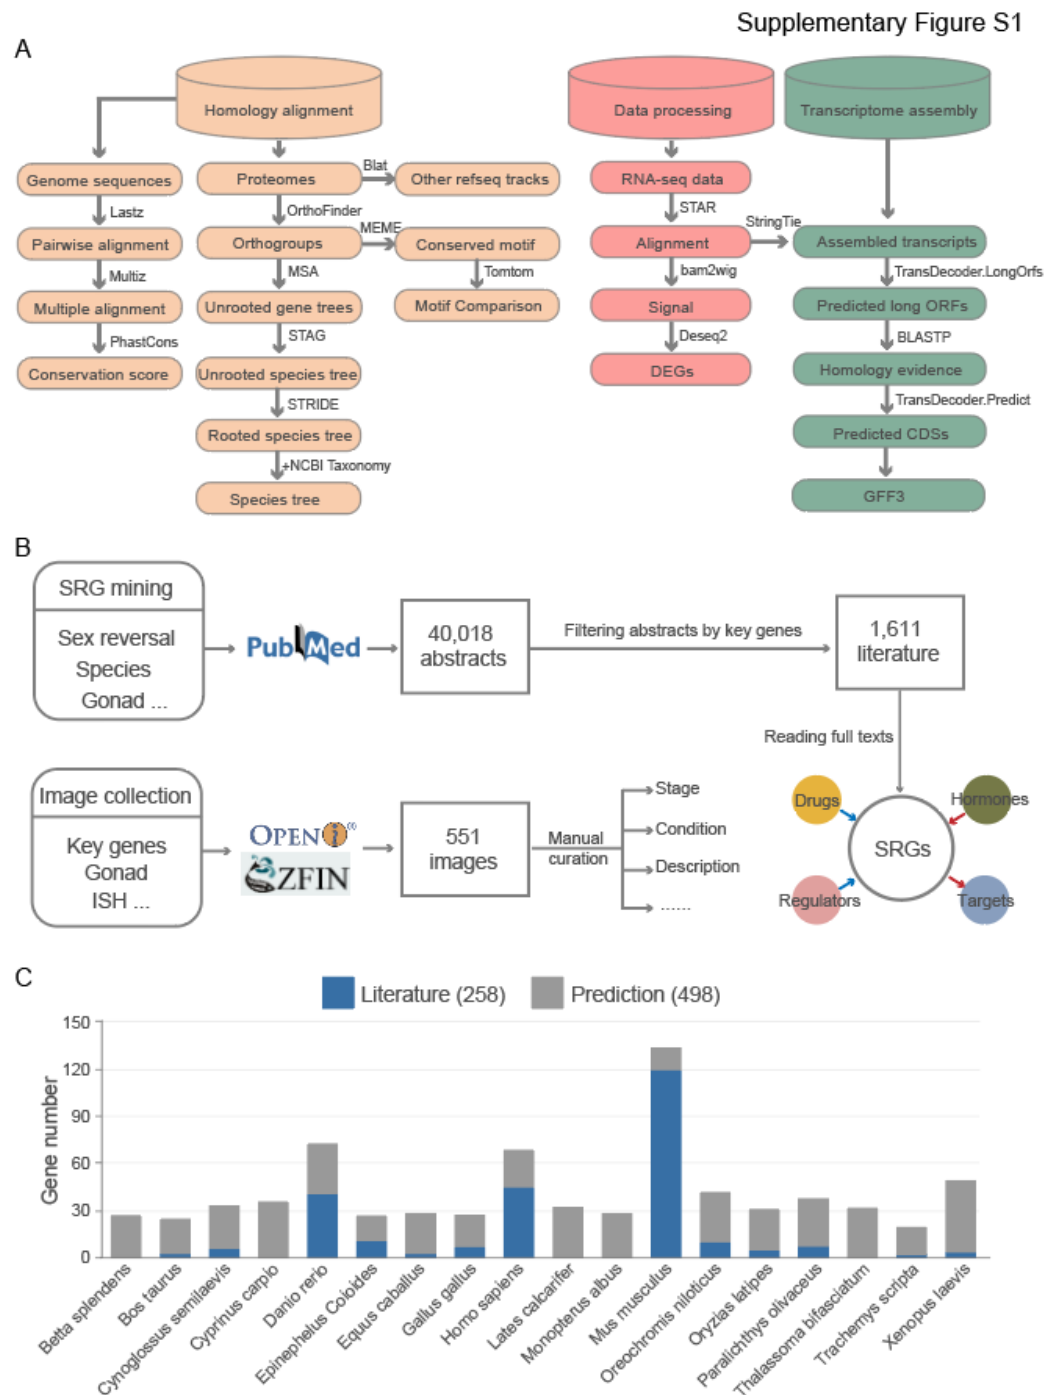

502

503 **Figure S1 Data processing pipelines and statistics of SRGs**

504 **A.** Workflows for building ASER, including homology alignment, RNA-seq data  
505 processing, and transcriptome assembly. **B.** Workflows for SRG mining, and image

506 collection and annotation. **C.** Statistics of validated SRGs and predicted genes  
 507 associated with sex reversal in the ASER database.

508

## 509 **Tables**

510 **Table S1 RNA-seq data used in the ASER database**

511 **Table S2 Wordlist and blacklist in SRG mining**

512 **Table S3 Literature mining of SRGs for the ASER database**

513
